# Supplementary material
Source: publisher figshare collection journal article supplement (https://acs.figshare.com/ndownloader/files/6558159)
Supplement: Supplementary file 1 [file 6558159]

# Supporting Information

## Synthesis of Bi<sub>2</sub>S<sub>3</sub>-Au dumbbelled heteronanostructures with enhanced photocatalytic and photoresponse properties

*Baoying Li,<sup>a</sup> Yihe Zhang,<sup>\*, a</sup> Ruifeng Du,<sup>a</sup> Lin Gan,<sup>\*, b</sup> Xuelian Yu<sup>\*, a</sup>*

<sup>a</sup> Beijing Key Laboratory of Materials Utilization of Nonmetallic Minerals and Solid Wastes, National Laboratory of Mineral Materials, School of Materials Science and Technology, China University of Geosciences, 100083 Beijing, P. R. China

<sup>b</sup> Huazhong Univ Sci & Technol, Sch Mat Sci & Engr, State Key Lab Mat Proc & Die & Mould Technol, 430074 Wuhan, P. R. China

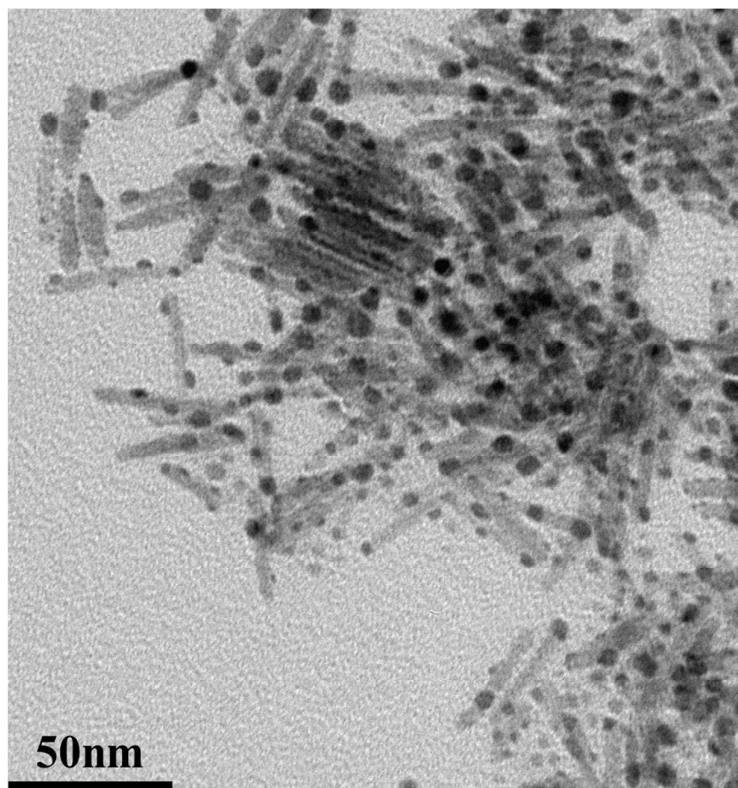

**Figure S1.**  $\text{Bi}_2\text{S}_3$ -Au dumbbelled heterostructures with larger size of Au nanoparticles.

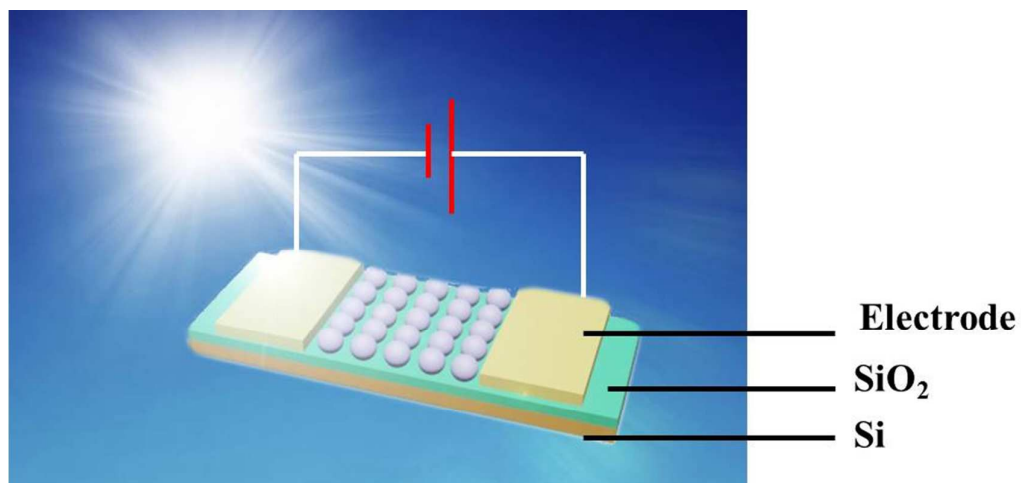

**Figure S2.** Schematic diagram of the device for photocurrent and photoreponse measurement.

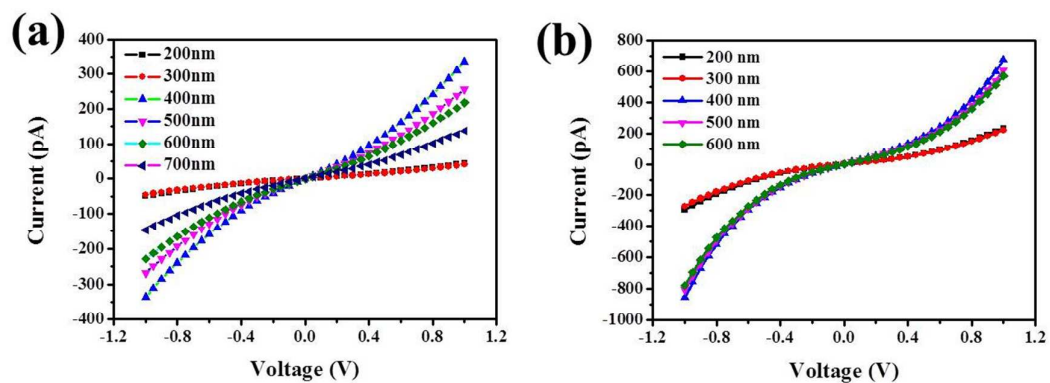

**Figure S3.** I-V characteristics of the Bi<sub>2</sub>S<sub>3</sub>-Au heterostructures under illumination with different wavelength. (a) Bi<sub>2</sub>S<sub>3</sub>-Au dumbbells and (b) Bi<sub>2</sub>S<sub>3</sub>-Au nanocorns.

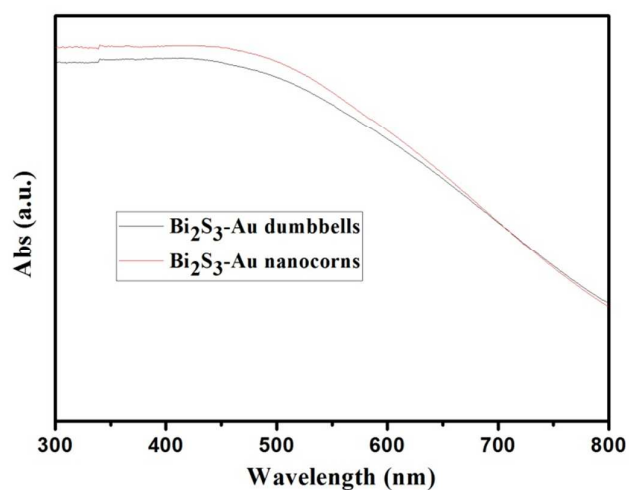

**Figure S4.** UV-vis spectra of Bi<sub>2</sub>S<sub>3</sub>-Au dumbbells and Bi<sub>2</sub>S<sub>3</sub>-Au nanocorns.

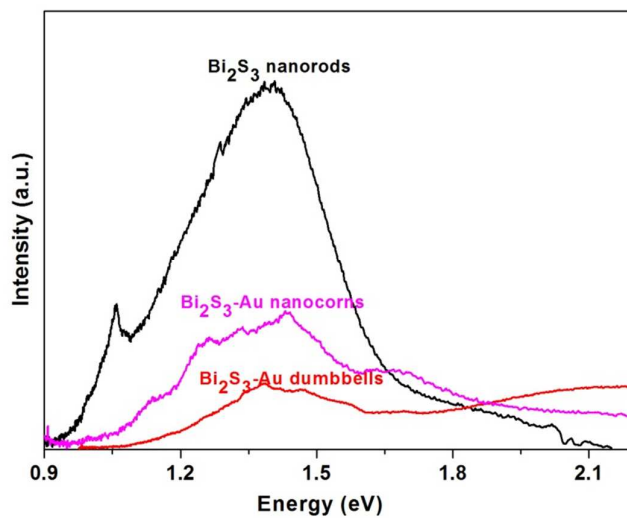

**Figure S5.** Photoluminescence spectra of Bi<sub>2</sub>S<sub>3</sub>, Bi<sub>2</sub>S<sub>3</sub>-Au dumbbells and Bi<sub>2</sub>S<sub>3</sub>-Au nanocorns.
